# Supplementary material for: Computational screening for high-activity MoS2 monolayer-based catalysts for the oxygen reduction reaction via substitutional doping with transition metal
Source: Royal Society of Chemistry journal article supplement (doi:10.1039/c7ta00577f), 2017-01-01
Supplement: c7ta00577f1.pdf [file c7ta00577f1.pdf]

**Computational Screening for High-Activity MoS<sub>2</sub> Nanosheets-Based Catalysts for  
the Oxygen Reduction Reaction via Substitutional Doping with Transition Metal**

Zhongxu Wang,<sup>1</sup> Jingxiang Zhao<sup>1,\*</sup>, Qinghai Cai<sup>1</sup>, Fengyu Li<sup>2,\*</sup>

<sup>1</sup> *Key Laboratory of Photonic and Electronic Bandgap Materials, Ministry of Education, and College of Chemistry and Chemical Engineering, Harbin Normal University, Harbin, 150025, China*

<sup>2</sup> *School of Physical Science and Technology, Inner Mongolia University, Hohhot, 010021, China*

\* To whom correspondence should be addressed. Email: xjz\_hmily@163.com (J.Z.) ;  
fengyuli@imu.edu.cn (F.L)

**Table S1.** The computed adsorption energies of OOH, O, and OH species on various TM-embedded MoS<sub>2</sub> monolayer.

|    | OOH   | O     | OH    |
|----|-------|-------|-------|
| V  | -3.17 | -6.59 | -4.57 |
| Cr | -2.03 | -4.80 | -3.47 |
| Mn | -1.86 | -4.36 | -3.37 |
| Fe | -2.19 | -4.52 | -3.62 |
| Co | -2.11 | -4.16 | -3.46 |
| Ni | -1.67 | -3.31 | -2.77 |
| Cu | -1.67 | -2.99 | -3.02 |
| Nb | -3.25 | -4.40 | -4.69 |
| Ru | -1.71 | -4.80 | -2.99 |
| Rh | -1.67 | -3.60 | -2.60 |
| Pd | -0.87 | -2.16 | -1.86 |
| Ag | -1.11 | -2.05 | -2.34 |
| Ta | -3.45 | -6.93 | -5.00 |
| W  | -3.43 | -6.45 | -4.24 |
| Re | -2.57 | -5.92 | -4.14 |
| Os | -2.11 | -5.44 | -3.51 |
| Ir | -1.88 | -4.48 | -3.03 |
| Pt | -1.06 | -2.99 | -2.24 |
| Au | -1.26 | -2.68 | -2.65 |

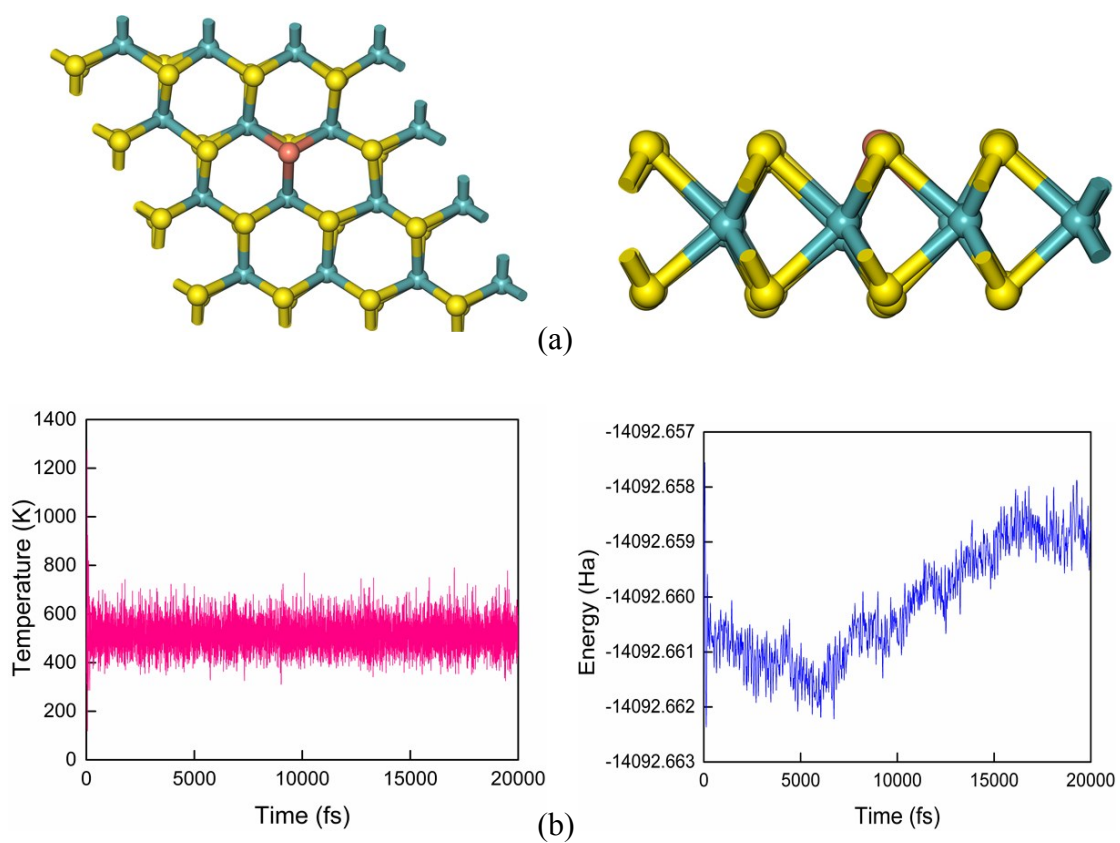

**Fig. S1.** (a) Geometry snapshot and (b) Temperature and energy fluctuations of Cu-embedded MoS<sub>2</sub> monolayer with respect to time in MD simulations at 20 ps at 500K.

The temperature was controlled by using the Nosé-Hoover method.

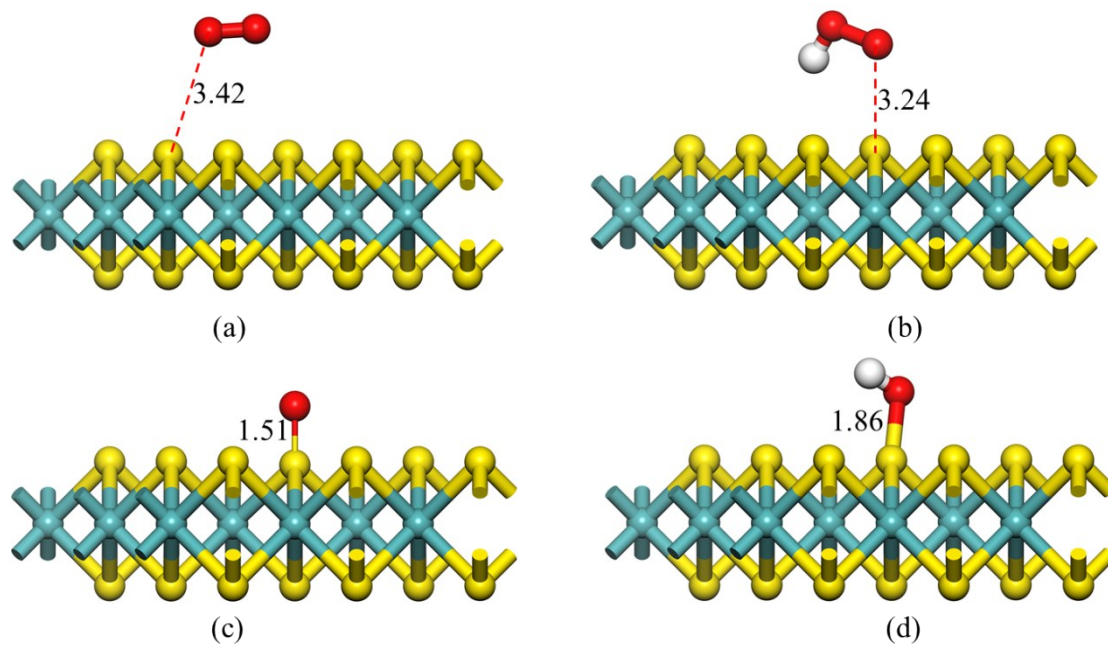

**Fig. S2.** The optimized adsorption configurations of (a) O<sub>2</sub>, (b) OOH, (c) O, and (d) OH species on the pristine MoS<sub>2</sub> monolayer.

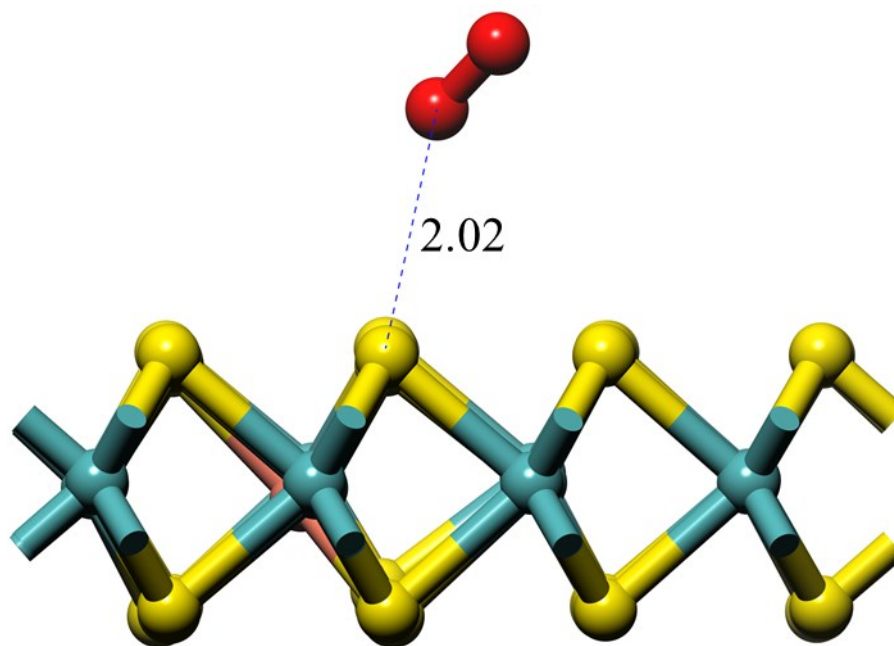

**Fig. S3.** The optimized structure of  $O_2$  adsorption on the Cu-doped  $MoS_2$  monolayer (one Mo atom in  $MoS_2$  monolayer is substituted by one Cu atom).
